# Supplementary material
Source: PubMed Central journal article supplement (PMC1832083)
Supplement: NIHMS16281-supplement-1.pdf [file NIHMS16281-supplement-1.pdf]

**SUPPLEMENTAL TABLE S1**  
*Real-time PCR primers*

| Target                       | GenBank accession number | Forward primer                 | Reverse primer                 |
|------------------------------|--------------------------|--------------------------------|--------------------------------|
| HCS <sup>1</sup>             | NM_141285                | 5'-AGTATTGGAATTGGAGAATGC-3'    | 5'-AACTTACATATTGATGGGAACC-3'   |
| Histone H4                   | NM_165383                | 5'-GTGCTGCGTGATAACATC-3'       | 5'-TGGCTGTAAGTGTCTTCC-3'       |
| MCC                          | NM_144467                | 5'-TATGGTGAGACTTTGGTGTGCGGA-3' | 5'-AACTGAATGAAGTGGGCGCCTTTG-3' |
| PC                           | NP_724837                | 5'-CGGTCAGTGCTGGTGGCTAAC-3'    | 5'-TTTGATGCCCAACTCTGTGC-3'     |
| SMVT                         | NP_651891                | 5'-TTTCGGTTTCTTTGCCAAGGGCGA-3' | 5'-AGCGAAATGGCGATGGGAATCGTT-3' |
| Defective chorion 1          | NP_511072                | 5'-ACAGCATGATCCCAACACAG-3'     | 5'-ACTTCAGGTGTCACAGTTG-3'      |
| Chitin binding peritrophin-A | NP_650314                | 5'-TGGACTTTATCAAGCAGCGG-3'     | 5'-TCCGGAACCCGATAGTTCTT-3'     |
| Yolk protein 2               | NP_511102                | 5'-TCGTACCAGGAGTACAAGCA-3'     | 5'-TGCAGAATGTAATCGCCCTG-3'     |
| Dopamine receptor 2          | NP_733299                | 5'-TTCTACCTGCCGCTTCTAGT        | 5'-CACGATGAATGCGCAATGTG-3'     |
